1 **Research Article:** Reduced consumption of protein-rich foods follows immune challenge in a  
2 polyphagous caterpillar

3 **Short title:** Immune challenged caterpillars avoid protein

4  
5 \*<sup>1+</sup>Peri A. Mason, \*<sup>2</sup>Angela M. Smilanich, <sup>3</sup>Michael S. Singer

6  
7 <sup>1</sup>Department of Ecology and Evolutionary Biology, University of Colorado Boulder, Boulder,  
8 CO 80309, USA and <sup>2</sup>Department of Biology, University of Nevada Reno, Reno, NV 89557,  
9 USA and <sup>3</sup>Department of Biology, Wesleyan University, Middletown, CT 06457, USA

10  
11 \*These authors contributed equally to this work.

12 <sup>+</sup>Author for correspondence (peri.mason@colorado.edu)

13  
14 **Summary**

15 Advances in ecological immunity have illustrated that, like vertebrates, insects exhibit adaptive  
16 immunity, including induced changes in feeding behavior that aid the immune system. In  
17 particular, recent studies have pointed to the importance of protein intake in mounting an  
18 immune response. In this study, we tested the hypothesis that the polyphagous caterpillar,  
19 *Grammia incorrupta* (Hy. Edwards, Erebidae), would adaptively change its feeding behavior in  
20 response to immune challenge, predicting that caterpillars would increase their intake of dietary  
21 protein. We further predicted that this response would enhance the melanization response, a  
22 component of the immune system that acts against parasitoids. We challenged the immune  
23 system using either tachinid fly parasitoids or a bead injection technique that has been used in  
24 studies to simulate parasitism, and measured feeding before and after immune challenge on diets  
25 varying in their macronutrient content. To evaluate the effects of diet on melanization, we  
26 quantified melanization of beads following feeding assays. Contrary to our prediction, we found  
27 that parasitized or injected caterpillars given a choice between high and low protein foods  
28 reduced their intake of the high protein food. Furthermore, in a no-choice experiment,  
29 caterpillars offered food with a protein concentration that is optimal for growth reduced feeding  
30 following immune challenge, whereas those offered a low protein food did not. Although  
31 variation in protein intake did not change caterpillars' melanization response, increased

32 carbohydrate intake did increase melanization, suggesting a prophylactic role for carbohydrates.  
33 We discuss alternative mechanisms by which variation in protein intake could negatively or  
34 positively affect parasitized caterpillars, including nutritional interactions with the caterpillar's  
35 self-medication response.

36

37 **Key words:** ecological immunity, macronutrient, parasitoid, bead injection, illness-induced  
38 anorexia

39

## 40 **Introduction**

41 Immunity in insects has traditionally been characterized as innate, in contrast to  
42 immunity in vertebrates, which has been recognized as having both innate and acquired  
43 components (Medzhitov and Janeway, 1998). However, a growing body of empirical work in the  
44 field of ecological immunology has shown that immune parameters in insects respond to various  
45 ecological factors, and may be induced on timescales relevant to the individual's fitness (Best et  
46 al., 2013; Rolff and Siva-Jothy, 2003; Schmid-Hempel, 2003; Schmid-Hempel, 2005;  
47 Schulenburg et al., 2009).

48 In insects, the strongest parallel to adaptive immunity in vertebrates (i.e., immunological  
49 memory) is immunological priming, whereby exposure to a pathogen acts in an inoculative  
50 manner, either with regard to future exposures in the treated individual, or in offspring (Kurtz  
51 and Franz, 2003; Moret and Schmid-Hempel, 2001; Moret and Siva-Jothy, 2003; Tidbury et al.,  
52 2011). However, induced immunological defense in insects is not limited to inoculation effects,  
53 and may act through pathogen-induced changes in behavior (Adamo, 2004). For example, desert  
54 locusts (*Schistocerca gregaria*) infected by a fungal pathogen were only able to produce viable  
55 offspring when they were permitted to thermoregulate to fever temperatures (Elliot et al., 2002).

56 In addition to illustrating that behavioral alteration of the thermal context for metabolic  
57 processes can affect immunity (Anderson et al., 2013; Elliot et al., 2002; Inglis et al., 1996),  
58 ecological immunity research also highlights the importance of chemical and nutritional inputs to  
59 the system (Adamo et al., 2010; Ayres and Schneider, 2009; Cotter et al., 2011; Lee et al.,  
60 2006b; Lefevre et al., 2010; nutritional aspects reviewed in Ponton et al., 2013; Siva-Jothy and  
61 Thompson, 2002). In a transgenerational example, monarch butterflies infected with a protozoan  
62 parasite adaptively select host plants that reduce infection in offspring (Lefevre et al., 2010).

63 Whereas medication studies focus on the therapeutic effects of plant secondary metabolites on  
64 individuals infected with parasites or pathogens (Lefevre et al., 2010; Simone-Finstrom and  
65 Spivak, 2012; Singer et al., 2009), nutritional studies focus on the role of primary plant  
66 metabolites in mediating these interactions (Adamo et al., 2010; Cotter et al., 2011; Lee et al.,  
67 2008; Povey et al., 2009; Srygley et al., 2009).

68 The insect immune response is composed of cellular and humoral responses that work in  
69 concert to defend against internal enemies (Beckage, 2008). Specialized immune cells  
70 (hemocytes) respond to signaling cascades initiated by the humoral response to isolate invaders  
71 and neutralize them via hemocyte asphyxiation and/or melanization cytotoxicity (Kanost and  
72 Gorman, 2008; Strand, 2008). These responses require significant amounts of nutrients and  
73 energy (Schmid-Hempel, 2003) and diet composition is an important factor contributing to  
74 immune efficiency (Lee et al., 2008; Siva-Jothy and Thompson, 2002).

75 The effects of dietary nutrients on the insect immune system are typically studied in  
76 terms of the macronutrients, protein and carbohydrate (Cotter et al., 2011; Lee et al., 2006b; Lee  
77 et al., 2008; Povey et al., 2009; Srygley et al., 2009). Macronutrients mediate normal  
78 physiological functioning in insects (Scriber and Slansky, 1981) and may be tightly regulated as  
79 insects forage (Behmer, 2009; Raubenheimer and Simpson, 2003; Simpson and Raubenheimer,  
80 1993). Although protein and carbohydrate intake targets reflect the overall physiological  
81 requirements of a given species, there is also intra-specific variation in these nutritional optima,  
82 based on the insect's sex, genetic line, and physiological condition (e.g., Behmer and Joern,  
83 2008; Cotter et al., 2011; Povey et al., 2009; Simpson and Raubenheimer, 1993). Some  
84 physiological functions, including processes involved in insect immunity, may be more protein  
85 or carbohydrate intensive than others (Cotter et al., 2011; Lee et al., 2006b; Povey et al., 2009;  
86 Srygley et al., 2009). When this is the case, plasticity in macronutrient regulation may facilitate  
87 enhancement of the immune response (Lee et al., 2006a; Povey et al., 2009). For example, in a  
88 study in which the generalist caterpillar *Spodoptera littoralis* was exposed to a  
89 nucleopolyhedrovirus, individuals fed diets with high protein to carbohydrate ratios were shown  
90 to have both increased resistance to the pathogen, and stronger constitutive immune function  
91 compared to individuals fed carbohydrate-biased diets. This led to the conclusion that protein  
92 costs of resistance were greater than energy costs (Lee et al., 2006b). Caterpillars that were

93 allowed to self-regulate their macronutrient intake made the adaptive dietary change, consuming  
94 a greater ratio of protein to carbohydrate than controls (Lee et al., 2006b).

95 Although Lee and colleagues used a generalist insect herbivore in their study, the  
96 variation in chemical and nutritional attributes that can exist within plant populations, and even  
97 individuals (Karban and Baldwin, 1997; Mattson, 1980), suggests that the adaptive regulation of  
98 macronutrients to enhance immunity is available even to monophagous or oligophagous species.  
99 However, the plausibility of this adaptive strategy would seem to depend on the variation in food  
100 attributes encountered by individuals in their environments. If so, grazing herbivores would be  
101 positioned particularly well to capitalize on both intra- and inter-specific plant variation (Lee et  
102 al., 2006a; Lee et al., 2003; Raubenheimer and Simpson, 1999; Raubenheimer and Simpson,  
103 2003).

104 In this study, we tested the hypothesis that herbivores adaptively alter macronutrient  
105 intake in response to immune challenge, predicting that the altered diet increases melanization of  
106 hemocytes, a component of the insect immune system that acts against parasitoids (Lavine and  
107 Strand, 2002; Strand, 2008). We tested this hypothesis in the grazing caterpillar *Grammia*  
108 *incorrupta* (Hy. Edwards [formerly *geneura* (Strecker)]; Erebidae). The species self-medicates  
109 using pyrrolizidine alkaloids (PAs) found in some host-plant species when infected with the  
110 larvae of tachinid flies (Bernays and Singer, 2005; Singer et al., 2009). However, this defensive  
111 strategy is costly: ingesting large quantities of PAs in the absence of parasitism can result in  
112 mortality (Singer et al., 2009). The observation that self-medication occurred during the late  
113 stage of parasitoid infection led to the hypothesis that during the early stage, caterpillars alter  
114 their nutritional intake to bolster the immune system, and that self-medication behavior ensues if  
115 this relatively low cost, first line of defense fails (Smilanich et al., 2011a).

116 The particular questions addressed in this study are a) whether there is a change in  
117 relative intake of protein and carbohydrate following immune challenge in *G. incorrupta*, and b)  
118 if that change affects caterpillars' melanization response. Based on results showing the  
119 importance of dietary protein in mounting an immune response in general (Lee et al., 2006b; Lee  
120 et al., 2008; Povey et al., 2009), and the melanization response in particular (Lee et al., 2006b),  
121 we designed experiments to address the specific prediction that immune-challenged caterpillars  
122 would increase the proportion of protein in the diet. In the first experiment, we compared  
123 macronutrient regulation in individuals that were challenged by injection with Sephadex beads

124 (Lavine and Beckage, 1996) with that of individuals that were parasitized by tachinid flies. This  
125 experiment is unique in using both bead-injection and live endoparasites as immune challenges  
126 to test behavioral predictions. It thus provided a rare comparative test of effects of parasitism and  
127 bead injection, a presumed surrogate of parasitism used in many other studies. In the second  
128 experiment, we allowed caterpillars to self-regulate intake of macronutrients before and after  
129 bead injection, predicting that bead-injected caterpillars would choose a more protein-biased  
130 diet. In the third experiment, we offered caterpillars either a diet with a protein concentration that  
131 is optimal for growth or a low protein diet, prior to, and subsequent to bead injection,  
132 anticipating that caterpillars fed the low protein diet would ingest a greater amount of food in  
133 order to answer the protein demands of the immune response.

134

## 135 **Results**

136 *Parasitism/Injection Experiment.* The feeding behavior of immune-challenged caterpillars  
137 differed significantly from that of controls for the two days following immune challenge. There  
138 was a significant treatment effect on the total amount of food eaten on each day following  
139 parasitism or injection (ANCOVAs Day 1:  $F_{2,79} = 9.45$ ,  $P = 0.0002$ ; Day 2:  $F_{2,74} = 9.94$ ,  $P =$   
140  $0.0001$ ). The Tukey test shows that feeding was reduced in both injected and parasitized  
141 individuals compared to controls (Fig. 1). Contrary to our prediction, reductions in food  
142 consumption were principally due to reductions in intake of the high protein food. In particular,  
143 parasitized individuals ate significantly less of the high protein diet than controls, a difference  
144 that was highly significant on the second day following infection (ANCOVAs Day 1:  $F_{2,76} =$   
145  $1.36$ ,  $P = 0.35$ ; Day 2:  $F_{2,76} = 10.84$ ,  $P < 0.0001$ )(Table S1)(Fig. 1). This result is also reflected in  
146 the diminished preference for high protein food in parasitized individuals in the second day  
147 following infection. Controls ate more high protein food than low protein food on both days (t-  
148 tests Day 1:  $t = 2.55$ ,  $df = 28$ ,  $P = 0.016$ ; Day 2:  $t = 3.39$ ,  $df = 57$ ,  $P = 0.0021$ ; Total:  $t = 3.07$ ,  $df =$   
149  $27$ ,  $P = 0.0049$ ). Injected caterpillars showed the same trend, but it was only significant the  
150 second day following infection (t-tests Day 1:  $t = 1.81$ ,  $df = 26$ ,  $P = 0.083$ ; Day 2:  $t = 2.55$ ,  $df =$   
151  $23$ ,  $P = 0.018$ ; Total:  $t = 2.23$ ,  $df = 21$ ,  $P = 0.037$ ), whereas parasitized caterpillars ate more high  
152 protein food the first day following immune challenge, but ate similar amounts of food on the

153 second day (t-tests Day 1:  $t = 3.036$ ,  $df = 28$ ,  $P = 0.0051$ ; Day 2:  $t = 0.62$ ,  $df = 26$ ,  $P = 0.54$ ;  
154 Total:  $t = 2.24$ ,  $df = 26$ ,  $P = 0.034$ ).

155 Although the consumption data show that reduced feeding is driven by reduced intake of  
156 the high-protein food following immune challenge, we did not find a significant difference in the  
157 ratio of protein to carbohydrate consumed by different treatment groups (ANCOVAs Day 1:  $F_{2,75}$   
158  $= 1.01$ ,  $P = 0.44$ ; Day 2:  $F_{2,75} = 0.31$ ,  $P = 0.75$ )(Table S2). However, there was a significant  
159 effect of the interaction between caterpillar family and treatment on the ratio of protein to  
160 carbohydrate chosen by caterpillars (ANCOVAs Day 1:  $F_{4,75} = 6.05$ ,  $P = 0.0003$ ; Day 2:  $F_{4,75} =$   
161  $3.27$ ,  $P = 0.016$ ). Although the ANCOVAs did not detect differences in ratios of protein to  
162 carbohydrate consumed, the raw amounts of protein and carbohydrate consumed by caterpillars  
163 following immune challenge did differ (MANCOVAs Day 1:  $F_{4,162} = 3.96$ ,  $P = 0.0043$ ; Day 2:  
164  $F_{4,146} = 4.04$ ,  $P = 0.0039$ )(Table S3)(Fig. 2). In particular, planned comparisons showed that the  
165 macronutrient intake of parasitized individuals differed significantly from controls on both days  
166 following infection (MANCOVAs Day 1:  $F_{2,54} = 10.70$ ,  $P = 0.0001$ ; Day 2:  $F_{2,52} = 10.80$ ,  $P =$   
167  $0.0001$ ), whereas injected individuals and controls did not differ significantly (MANCOVAs Day  
168 1:  $F_{2,52} = 2.39$ ,  $P = 0.10$ ; Day 2:  $F_{2,49} = 1.96$ ,  $P = 0.15$ ). Differences in the bivariate response  
169 between parasitized and control individuals were associated with a reduction in both protein and  
170 carbohydrate intake during the first day (ANCOVAs Protein:  $F_{1,55} = 10.43$ ,  $P = 0.0021$ ;  
171 Carbohydrate:  $F_{1,55} = 19.43$ ,  $P < 0.0001$ ), and second day following infection (ANCOVAs  
172 Protein:  $F_{1,53} = 21.57$ ,  $P < 0.0001$ ; Carbohydrate:  $F_{1,53} = 8.43$ ,  $P = 0.0054$ ).

173 *Feeding Behavior Before and After Immune Challenge.* Consistent with the Parasitism/Injection  
174 experiment, there was a treatment effect on the total amount of food consumed by caterpillars in  
175 this experiment, which we will refer to as the Choice Experiment (ANCOVA  $F_{2,42} = 3.88$ ,  $P =$   
176  $0.028$ )(Table S4). Immune-challenged individuals ate less food than controls, and reduced  
177 feeding was underlain by reductions in consumption of high protein foods following immune  
178 challenge (Fig. 3, “After immune challenge”). Also in keeping with the Parasitism/Injection  
179 Experiment, analyzing data in terms of ratio of protein to carbohydrate in self-chosen diets  
180 obscured these differences (Table S5). Treatment itself was not a significant determinant of the  
181 macronutrient ratio consumed, nor did we detect an effect of treatment on the change in protein  
182 to carbohydrate ratio before and after the time of injection (reflected in the lack of a significant

183 treatment \* time interaction, Table S5). The bivariate analysis revealed a marginally significant  
184 change in nutrient regulation following immune challenge (MANCOVAs Before:  $F_{4,132} = 1.08$ ,  
185  $P = 0.37$ ; After:  $F_{4,90} = 2.29$ ,  $P = 0.066$ ). Planned comparisons showed caterpillars in the injected  
186 treatment to differ significantly from controls (MANCOVAs Before:  $F_{2,44} = 0.82$ ,  $P = 0.45$ ;  
187 After:  $F_{2,44} = 6.39$ ,  $P = 0.0037$ ), whereas differences between sham-injected individuals and  
188 controls were marginally significant (MANCOVAs Before:  $F_{2,42} = 2.05$ ,  $P = 0.14$ ; After:  $F_{2,42} =$   
189  $3.02$ ,  $P = 0.059$ ) following infection. Differences between injected and control individuals were  
190 due to reduced intake of both protein and carbohydrate following injection (ANCOVAs Protein:  
191  $F_{2,45} = 12.03$ ,  $P = 0.0012$ ; Carbohydrate:  $F_{1,45} = 5.76$ ,  $P = 0.021$ ), whereas only protein intake  
192 was significantly reduced in sham-injected individuals (ANCOVA  $F_{1,43} = 5.92$ ,  $P = 0.019$ ) (Fig.  
193 4).

194 Caterpillars in this experiment ate significantly more than those in the  
195 Parasitism/Injection experiment, which can be explained by their greater size: caterpillars used in  
196 the Choice Experiments were 30% larger than those in the Parasitism/Injection Experiment (t-  
197 test (caterpillar mass):  $t = -11.03$ ,  $df = 168$ ,  $P < 0.0001$ ). Caterpillars in the Choice Experiment  
198 also showed a marked preference for the low protein food in contrast to those in the  
199 Parasitism/Injection Experiment, which preferred the high protein food in the absence of immune  
200 challenge (Fig. 1).

201 When caterpillars were allowed to self-regulate their intake of macronutrients, the  
202 tendency to eat less food following injection did not improve melanization capability (Fig. 5).  
203 The amount of food consumed by caterpillars following injection was positively (though weakly)  
204 associated with bead melanization (Fig. 5). Because the amounts of protein and carbohydrate  
205 consumed were highly correlated ( $r = 0.95$ ,  $P < 0.0001$ ), it is difficult to discern if one of these  
206 macronutrients or the other is responsible for this relationship. However, when protein was  
207 correlated with melanization, it yielded a marginally significant result (Spearman's  $\rho = 0.45$ ,  $P =$   
208  $0.074$ ), whereas when carbohydrate and melanization were correlated a significant result was  
209 obtained (Spearman's  $\rho = 0.50$ ,  $P = 0.047$ ).

210 *No-Choice Experiment.* The amount of food that caterpillars consumed depended on the  
211 immune-challenge treatment (ANCOVA:  $F_{2,105} = 5.98$ ,  $P = 0.0045$ ), the macronutrient content of  
212 the diet ( $F_{1,105} = 13.03$ ,  $P = 0.0007$ ), the interaction between time and treatment ( $F_{2,105} = 5.69$ ,  $P$

213 = 0.0045), and the three way interaction between time point, level of immune challenge and diet  
214 ( $F_{2,105} = 4.16$ ,  $P = 0.018$ )(Table S6). Contrary to the prediction that caterpillars would increase  
215 intake of low protein food in response to an immune challenge, caterpillars in all three treatment  
216 groups consumed the same amount of low protein food after the time of injection (Fig. 6).  
217 However, both bead-injected and sham-injected caterpillars consumed significantly less optimal  
218 protein food than controls, with the size of the reduction tracking the severity of immune  
219 challenge; sham-injected caterpillars ingested 26.9% less optimal protein food, and bead-injected  
220 individuals ingested 58.3% less optimal protein food than controls (Fig. 6). In addition,  
221 caterpillar families varied significantly in how much food they consumed ( $F_{3,105} = 6.57$ ,  $P =$   
222 0.0006).

223 The observed reduction in optimal protein food intake among immune-challenged  
224 individuals did not adaptively affect melanization. We did see a negative correlation between  
225 amount of food eaten and melanization but it was non-significant (Fig. 5). Instead, the amount of  
226 low protein diet consumed prior to injection was significantly and positively associated with the  
227 degree to which beads were melanized (Fig. 5).

## 228 Discussion

229 Our findings support the hypothesis that the dietary generalist herbivore, *G. incorrupta*,  
230 modifies its macronutrient intake in response to immune challenge. However, contrary to our  
231 prediction, immune-challenged caterpillars did not increase their intake of dietary protein. In  
232 fact, caterpillars reduced feeding in response to immune challenge, and this reduction was  
233 stronger with regard to the high protein food, than the low protein food. Interestingly, control  
234 caterpillars in the Parasitism/Injection Experiment preferred high protein food, whereas those in  
235 the Choice Experiment preferred low protein food (Figs. 1, 3). We are uncertain as to what  
236 underlies this difference in preference but speculate that it may be the result of differences in  
237 caterpillar stock used. These differences could be genetic, or could stem from transgenerational  
238 environmental effects, since the parents of caterpillars in the Parasitism/Injection experiment  
239 were collected from the wild, whereas those used in the Choice and No-choice experiments had  
240 been bred for several generations under laboratory conditions. Alternatively, some caterpillars  
241 used in the Parasitism/Injection experiment could have been in their penultimate, rather than  
242 final larval stadium. *Grammia incorrupta* exhibits life-history plasticity in the number of stadia it



243 undergoes, and there is a high degree of body size variation within each stadium. Since  
244 caterpillars were freeze-killed following feeding assays, we cannot be sure whether they would  
245 have undergone an additional stadium. If so, it would not change the relevance of this study,  
246 given that tachinid flies readily attack, and are successful on *G. incorrupta* individuals during  
247 both stages of their life history (personal observation). The observation that caterpillars in the  
248 two experiments converged on the tendency to eat less protein-rich food following immune  
249 challenge suggests that this response may be adaptive when circumstances (e.g., genetic  
250 background, hormonal milieu) vary.

251         It may seem counterintuitive that caterpillars could specifically reduce their intake of  
252 high protein food following parasitism without significantly changing the ratio of macronutrients  
253 in the diet. However, this is a possibility associated with the experimental diets used here. Each  
254 time caterpillars ingested some protein, they would necessarily ingest some carbohydrate and  
255 vice versa, perhaps swamping out variation in proportional consumption. The relative aversion to  
256 high protein foods seen here suggests that, rather than bolstering the immune response as shown  
257 in *Spodoptera* species (Lee et al., 2006b; Povey et al., 2009), excess dietary protein may be  
258 detrimental to immunity in *G. incorrupta*. However, if the cost of consuming a high protein diet  
259 stemmed from a negative effect of protein on the melanization response, we would have  
260 expected protein consumption after injection to be negatively correlated with bead melanization,  
261 an expectation that was not met by results of the Choice Experiment (Fig. 5). A stringent test of a  
262 costly-protein hypothesis would require measuring immune attributes in response to a high  
263 protein diet, rather than an optimal-protein or self-regulated diet.

264         Although protein content of the diet was not positively correlated with melanization, as  
265 anticipated, our results do suggest that dietary nutrients interact with the melanization response  
266 in *G. incorrupta*. When caterpillars were fed a low protein, carbohydrate-rich diet, the amount of  
267 food consumed before injection was positively correlated with bead melanization. However, the  
268 same was not true of caterpillars fed the optimal protein diet (Fig. 5). Because protein and  
269 carbohydrate were inversely correlated in experimental diets, this could mean either that  
270 caterpillars benefitted from increased carbohydrate, or from reduced protein in foods, prior to  
271 immune challenge. If protein were detrimental to the melanization response, we would have  
272 expected the amount consumed of the optimal protein diet prior to injection to be negatively

273 correlated with melanization, which was not the case (Fig. 5). This suggests that carbohydrate,  
274 rather than protein, may limit the prophylactic action of nutrients toward immunity. A similar  
275 result was found in the mosquito, *Anopheles gambiae*, which melanized beads to a greater degree  
276 when reared on diets rich in glucose (Schwartz and Koella, 2002). Increased feeding on  
277 carbohydrate-rich foods may lead to greater mass of the fat body, the site of production for many  
278 immune precursors (Beckage, 2008). If carbohydrate consumption increases the mass of the fat  
279 body, this is one mechanism by which melanization capability may have been enhanced.

280 Interestingly, there was no correlation between the amount of food eaten and the degree  
281 of bead melanization when caterpillars were allowed to self-regulate their macronutrient intake  
282 prior to injection (Choice Experiment, Fig. 5). This suggests that, in the absence of immune  
283 challenge, caterpillars self-regulate to a lower carbohydrate intake target than would provide a  
284 prophylactic benefit to the immune system (21P:19C when self-regulated, compared to  
285 15P:25C)(Fig. 5). This could result, for example, if the carbohydrate requirement of the  
286 melanization response conflicted with the protein requirement of growth and reproduction.  
287 Tradeoffs between the immune system and life-history traits (Adamo et al., 2010; Cotter et al.,  
288 2008; Fedorka et al., 2004; Ponton et al., 2011; Zuk and Stoehr, 2002), as well as those between  
289 different parameters within the immune system are well documented (Cotter et al., 2004; Cotter  
290 et al., 2011; Povey et al., 2009). A potential tradeoff with particular relevance to this system  
291 might be that between the balance of nutrients and the balance of beneficial plant secondary  
292 metabolites in the insect's diet. Eating a mixture of plants containing different defensive  
293 chemicals acts to defend *G. incorrupta* against at least one generalist predator (P. A. Mason et  
294 al., unpublished). If the defensive benefit of mixing host plants (in the absence of parasitism) is  
295 stronger than the benefit of prophylactic enhancements to the immune system, caterpillars would  
296 be expected to mix foods on short timescales, even if doing so would lead to a sub-optimal  
297 melanization response, as seen here. The effects of nutrients in conjunction with secondary  
298 metabolites can indeed affect dietary preference and the performance consequences thereof  
299 (Behmer et al., 2002; Slansky and Wheeler, 1992).

300 The observation that the amount of food eaten and melanization were only positively  
301 correlated when caterpillars were allowed to self-regulate dietary macronutrients (Fig. 5)  
302 contrasts with the finding by Cotter and colleagues (2011) that the macronutrient ratio in the diet

303 affects immune attributes more strongly than the caloric density of food. Instead, it suggests that  
304 the quality and quantity of foods may interact to affect immune parameters in *G. incorrupta*. A  
305 similar effect was seen in an investigation of how illness-induced anorexia might reduce  
306 competing demands of immunity and digestion in the cricket, *Gryllus texensis* (Adamo et al.,  
307 2010). Resistance to bacterial infection was reduced when crickets were fed lipid-rich foods, and  
308 although crickets reduced feeding following immune challenge, they exhibited the adaptive  
309 preference for foods with low lipid content at that time (Adamo et al., 2010).

310 A number of hypotheses have been put forth to explain anorexic behavior in response to  
311 disease (Adamo, 2006; Kyriazakis et al., 1998), and of these, four can be addressed to some  
312 extent by this work. One is that parasitoids induce reductions to feeding for their own benefit.  
313 Although adaptive parasite manipulation of host feeding behavior has been shown in some  
314 systems (Hughes et al., 2012; Moore, 2002), this explanation is unlikely given that bead-injected  
315 individuals also exhibited an anorexic response (though one that was less pronounced than that  
316 of parasitized individuals). Another hypothesis, that anorexia enhances the immune response, is  
317 not supported by our melanization results, however, there are many immune parameters that we  
318 did not measure here.

319 Two related hypotheses regarding disease induced anorexia do seem to be supported by  
320 this study, 1) that anorexia allows individuals to be more selective in the foods that they eat, and  
321 2) that anorexia serves to starve parasites. In this study, caterpillars exhibited an anorexic  
322 response that differed with respect to different types of foods, supporting the former hypothesis.  
323 The latter has been discounted to some extent on the basis that the main prediction of the  
324 hypothesis is not generally met in mammals (Kyriazakis et al., 1996; Kyriazakis et al., 1994),  
325 namely that the anorexic response should be more pronounced with regard to high quality foods  
326 than low quality foods (Kyriazakis 1998). However, our results do meet this expectation;  
327 caterpillars exhibited anorexia particularly with regard to protein-rich foods (see also Adamo et  
328 al., 2010).

329  
330 Perhaps reduced ingestion of high protein foods acts to retard the development of  
331 parasitoids. Protein levels in the hemolymph respond to dietary protein (Lee et al., 2008; Povey  
332 et al., 2009; Thompson et al., 2005), and can affect parasitoid development (Thompson et al.,

333 2005). If this is the case here, lower protein titers in the hemolymph could translate to slower  
334 growth of parasitoids during the early stage of infection, when parasitoid larvae are likely to be  
335 most vulnerable to the host's melanization response. An immunological strategy that combines  
336 slowing growth of parasitoids by nutritional means with the melanization response could be  
337 particularly effective in *G. incorrupta* because a) their grazing feeding strategy allows them to  
338 access the necessary nutritional variation, and b) they possess a particularly strong melanization  
339 response relative to other caterpillar species (A. M. Smilanich, personal observation). Moreover,  
340 such a strategy may incur little cost, given that a lower protein diet can afford *G. incorrupta* a  
341 comparable growth benefit to the optimal protein food used here (see Fig. A1, Appendix II).

342  
343 Because parasitized caterpillars in this study succumbed to parasitoid infection (data not  
344 shown), we conclude that anorexia alone is insufficient to overcome parasitoids. However, it is  
345 possible that anorexia acts in conjunction with melanization and/or self-medication to defend  
346 caterpillars against parasitoid infection. *Grammia incorrupta* caterpillars self-medicate using  
347 pyrrolizidine alkaloids during the late stage of parasitoid infection (approximately 96 hours after  
348 oviposition), enhancing their survival (Singer et al., 2009; Smilanich et al., 2011a). If the  
349 efficacy of self-medication is contingent on the condition (e.g., size) of parasitoids at that time-  
350 point, the effects of caterpillar diets on parasitoid development could have major fitness  
351 consequences under natural circumstances, when caterpillars can harness both macronutrient and  
352 chemical variation in plants. This hypothesis is consistent with the expectation that generalist  
353 herbivores should be positioned particularly well to employ complex, immunity-enhancing  
354 behavioral strategies (Lee et al., 2006a; Lee et al., 2003; Raubenheimer and Simpson, 1999;  
355 Raubenheimer and Simpson, 2003).

356 Although both parasitized and unparasitized, immune-challenged caterpillars exhibited  
357 anorexia, we also observed a difference in nutrient intake between parasitized and injected  
358 caterpillars in the Parasitism/Injection Experiment (Fig. 1). One possible explanation is that  
359 parasitoids had taken control of host nutrient intake for their own benefit (Hughes et al., 2012;  
360 Moore, 2002). As we did not measure the effects of diet on parasitoid fitness here, this  
361 hypothesis is difficult to evaluate. Another possibility is that parasitism disrupted the caterpillar's  
362 regulation of nutrient intake. Thompson and Redak (2005) showed such a breakdown in  
363 *Manduca sexta* caterpillars in response to wasp parasitism by using choice experiments

364 employing multiple pairs of foods that differed in their macronutrient content. Using this design  
365 they were able to conclude that parasitized individuals fed indiscriminately, whereas controls  
366 maintained a macronutrient intake target regardless of the macronutrient ratios in the pairs of  
367 foods offered (Thompson and Redak, 2005). Our experimental design precludes using this  
368 method to draw such a conclusion; however, if nutrient regulation had broken down in response  
369 to parasitism, we would expect greater variance in the amounts of each food eaten by parasitized  
370 and control individuals. To test this, we applied Brown-Forsythe tests for unequal variances to  
371 the proportion of high protein food eaten each day following parasitism, and found that variances  
372 did not differ among treatments (Day 1:  $F_{2,82} = 1.166$ ,  $P = 0.20$ ; Day 2:  $F_{2,76} = 2.21$ ,  $P = 0.12$ ).  
373 Nonetheless, differences in the extent to which feeding was affected in parasitized and injected  
374 individuals illustrates that at least some part of the cue inducing this change is biotic.

## 375 **Conclusions**

376 Contrary to findings from similar studies, immune-challenged caterpillars reduced their  
377 intake of high protein food. Prior to immune challenge, greater intake of carbohydrate-biased  
378 diets improved the melanization response. After immune challenge, increased feeding on diets  
379 with self-selected macronutrient ratios improved melanization, whereas eating more of diets with  
380 fixed macronutrient ratios did not. This suggests that immune function is affected by the  
381 interaction between food quality (macronutrient ratio) and quantity in *G. incorrupta*. We  
382 hypothesize that these dietary attributes may also interact with developing parasitoids, and their  
383 susceptibility to anti-parasitoid resistance from both the melanization response, and self-  
384 medication by their hosts. These findings reinforce the notion that the immune response,  
385 including its behavioral components, can be expected to differ depending on the host, the  
386 pathogen or parasite, and numerous other ecological considerations.

387

## 388 **Materials and Methods**

389 *Study System.* Caterpillars of *Grammia incorrupta* (Erebidae) are grazing generalist herbivores,  
390 feeding on over 80 species of plants in 50 different plant families (Singer and Stireman, 2001).  
391 This species inhabits arid grasslands and woodlands of the Southwestern US and Northwestern  
392 Mexico (Schmidt and Sperling, 2008). Host-plant switching is a common behavior and moving

393 between individual host plants over the course of a day is a regular occurrence (Singer et al.,  
394 2002). This grazing dietary strategy benefits the species by improving its physiological  
395 efficiency (P. A. Mason et al., unpublished), as well as providing defense against natural enemies  
396 (Singer et al., 2004; Singer and Stireman, 2003). On average, 15% of *G. incorrupta* caterpillars  
397 in natural populations experience mortality from parasitoids, with the majority of parasitism  
398 coming from tachinid fly species, including *Exorista mella* and *Chetogena* species, and to a  
399 lesser extent from hymenopteran parasitoids (Stireman and Singer, 2002). Given the nutritional  
400 variation that individuals are likely to encounter by using such a broad range of host plants, it  
401 seems likely that grazing individuals could also adaptively alter their diet to support the immune  
402 system.

403         These experiments took place in the Singer lab at Wesleyan University. The Choice and  
404 No-Choice experiments were performed in the fall of 2008, and the Parasitism/Injection  
405 Experiment was performed during the summer of 2009. Caterpillars used for the experiments  
406 were taken from a laboratory breeding colony, initiated from caterpillars originally collected in  
407 southeastern Arizona, USA. Colony individuals were reared on a nutritious, wheat-germ based  
408 rearing diet (Yamamoto, 1969), as were individuals used in experiments prior to feeding on  
409 experimental diets. All caterpillars used in experiments were housed in 167.2 ml clear plastic  
410 cups (Russell Hall Co., Meriden, CT, USA).

411 *Parasitism/Injection Experiment.* The purpose of this experiment was to test a) for changes in  
412 feeding behavior in response to immune challenge, and b) whether the Sephadex bead injection  
413 technique (described below), which has been used in prior studies to mimic parasitoid infection  
414 in *G. incorrupta* and other species (Lavine and Beckage, 1996; Smilanich et al., 2011a;  
415 Smilanich et al., 2011b), elicits the same feeding behavior in *G. incorrupta* as parasitism by a  
416 tachinid fly. We predicted that, when allowed to self-regulate, both parasitized and injected  
417 caterpillars would consume more of the high protein food than controls. We are confident that  
418 the fly species used here attacks *G. incorrupta* during the final larval stadium in the wild because  
419 we obtained flies for the laboratory colony by collecting *G. incorrupta* caterpillars in their final  
420 stadium upon which fly eggs were visible.

421         After the final larval molt, we weighed caterpillars and distributed them among three  
422 treatments: those that would act as controls, those that would be injected with beads, and those

423 that would receive parasitoid eggs. The low protein food contained 15% protein and 25%  
424 carbohydrate, by dry weight, and the high protein food contained 35% protein and 5%  
425 carbohydrate, by dry weight (see Appendix I for complete list of ingredients). We varied  
426 macronutrient ratios, rather than raw amounts, because protein and carbohydrate concentrations  
427 in plants are often inversely correlated (Bernays and Chapman, 1994) and their consumption by  
428 insect herbivores non-independent (Raubenheimer and Simpson, 1999; Raubenheimer and  
429 Simpson, 2004; Simpson and Raubenheimer, 1993; Simpson et al., 2004). Presenting food to  
430 caterpillars in this manner allowed caterpillars to self-regulate to a target ratio.

431 Caterpillars in the parasitism treatment were exposed to tachinid flies, either *Chetogena*  
432 *edwardsi* or *C. tachinomoides*, on the day of their final larval molt. We used two closely related  
433 fly species in these experiments because both were present in our tachinid colony at the time and  
434 we could not reliably distinguish the two species during experiments. After the experiment, we  
435 received confirmation from a taxonomic expert (J.O. Stireman) on the identities of tachinid  
436 specimens saved from the experiment. Although it is possible that these congeners elicit different  
437 feeding responses in *G. incorrupta*, we did not test that experimentally. Caterpillars were  
438 exposed to flies for several minutes until they had received 1-3 eggs. Three attempts were  
439 permitted, and then caterpillars were inspected more closely in a clear plastic vial to ensure that  
440 at least one egg was present. Since it takes 48 to 60 hours for *Chetogena* larvae to hatch from  
441 eggs and burrow through the cuticle (Smilanich et al., 2011a), caterpillars in the injection  
442 treatment were injected two days after the final larval molt, so that the moment of injection  
443 would approximate the moment that parasitoids entered caterpillars (injection technique  
444 described under *Immune Assay* below). We measured the amounts of each food block eaten by  
445 caterpillars in all three treatments for two days following the time of immune challenge in order  
446 to assess whether injected caterpillars grouped with controls or parasitized caterpillars in how  
447 much food, and the ratio of protein to carbohydrate that they consumed. To do this, we weighed  
448 initial amounts of food provided to caterpillars on both feeding days and converted these to dry  
449 weights using a wet-dry conversion curve. Dry weights of food that remained after 24 hours  
450 (food was removed after each of the two feeding days) were then subtracted from initial dry  
451 weights to determine the dry mass of food eaten each day.

452 *Feeding Behavior Before and After Immune Challenge.* In this experiment we tested whether  
453 caterpillars regulate macronutrient intake differently before and after immune challenge. We  
454 predicted that caterpillars would bias macronutrient intake towards protein following injection by  
455 ingesting a greater amount of the high protein food than controls. As in the previous experiment,  
456 injection with Sephadex beads represented the challenge to the immune system (Lavine and  
457 Beckage, 1996). Unlike in the previous experiment, we included a sham injection group in which  
458 individuals were injected with only isotonic Ringer's solution and no beads to control for the  
459 wound response to injection (Smilanich et al., 2011a). We predicted that immune-challenged  
460 individuals would regulate their macronutrient ratio toward a higher protein intake in response to  
461 the immune challenge. On the third day of the final larval stadium, caterpillars were offered  
462 blocks of both low protein and high protein foods (15P:25C and 35P:5C dry weight  
463 respectively), and allowed to self-regulate their macronutrient intake for 24 hours prior to bead-  
464 injection, sham, and control treatments. After the time of immune challenge, caterpillars were  
465 given fresh food blocks and allowed to feed for an additional 24 hours. The third day and fourth  
466 day of the stadium were chosen for feeding assays because they represent the middle of the final  
467 larval stadium, when caterpillars feed most (pers. obs.). For comparison, the timing of immune  
468 challenge was one day later in this experiment than in the Parasitism/Injection experiment.  
469 Because some caterpillars did not eat for several days after molting, we allowed the day number  
470 to vary to ensure that caterpillars had initiated feeding before receiving the immune challenge.  
471 Amounts of food eaten were determined as described above, and injected individuals were  
472 freeze-killed at the end of the feeding trial and dissected later to determine bead melanization.

473 *No-Choice Experiment.* In this experiment, we tested whether there would be differences in  
474 caterpillars' consumption of two diets that differed in their macronutrient ratio after immune  
475 challenge. We predicted that immune-challenged caterpillars would increase protein  
476 consumption through compensatory feeding on the low protein diet (Raubenheimer and  
477 Simpson, 1993; Slansky and Wheeler, 1992). Therefore, we expected greater consumption of the  
478 low protein diet than the high protein diet among immune-challenged individuals. As in the  
479 Choice Experiment described above, we challenged the immune system using bead injection  
480 during the fourth day of the final larval stadium, and compared feeding responses between  
481 injected individuals, sham-injected and control groups. Conducting a no-choice test in



482 conjunction with the choice test described above would also permit us to differentiate between  
483 preference for a given food type, and aversion to the alternative.

484 All individuals were subjected to a no-choice feeding assay for 24 hours prior to, and 24  
485 hours subsequent to, the time of injection. Caterpillars were offered either a low protein, or an  
486 optimal protein food (15P:25C and 25P:15C dry weight respectively), so that mixing foods was  
487 not a possibility. We consider 25P:15C an optimal ratio because preliminary experiments  
488 showed that a) it afforded *G. incorrupta* the greatest growth on average among five experimental  
489 diets that varied in their macronutrient ratios (Fig. S1, Appendix II), and b) caterpillars chose a  
490 similar ratio when allowed to self-select a macronutrient intake target (Fig. S2, Appendix II).

491 On the third day of the seventh larval stadium, individuals were randomly assigned to  
492 injection, sham, or control groups as well as optimal protein diets or low protein diets. Each  
493 treatment level received 20 individuals. After 24 hours of feeding, individuals were injected  
494 with Sephadex beads or sham injected, then returned to their respective diets to continue feeding  
495 for another 24 hours. We measured amounts of food eaten on each day using the method  
496 described above. Injected individuals were freeze-killed at the end of the feeding trial and  
497 dissected later for retrieval of beads (see Immune Assay below).

498 *Immune Assay.* To measure the melanization response to dietary nutrition, *G. incorrupta*  
499 caterpillars were injected with Sephadex beads (Sephadex A25, 40-120  $\mu\text{m}$ ; Sigma-Aldrich, St.  
500 Louis, MO, USA) as a proxy for parasitism (Lavine and Beckage, 1996; Smilanich et al., 2009a;  
501 Smilanich et al., 2009b). We predicted an increase in the melanization response in individuals  
502 with an optimal ratio of dietary protein to carbohydrate. Sephadex beads were dyed red using  
503 0.1% Congo red (dye content 35%; Sigma-Aldrich, St. Louis, MO, USA) and were suspended in  
504 Ringer's solution so that 5-10 beads could be injected into the base of the third proleg. Injections  
505 were done using Pasteur pipettes (Sigma-Aldrich, St. Louis, MO, USA) that we had stretched  
506 under heat in order to create tiny glass needles (Lavine and Beckage, 1996). Caterpillars were  
507 then returned to their test diets and freeze-killed at the end of the feeding trial (after an additional  
508 24 hours). To retrieve beads, caterpillars were dissected in 95% methanol and beads were  
509 photographed using a camera mounted on a dissection microscope focused at 80x magnification  
510 (Carl Zeiss Discovery V.8, AxioVision software; Carl Zeiss Microscopy, LLC, Thornton, NY,  
511 USA). Since the beads were dyed red before injecting them into the caterpillars, we quantified

512 melanization by measuring the red value, a scale ranging from 0-255, where 0 = pure gray, and  
513 255 = pure red, for each bead. The lower the r-value, the blacker the bead, indicating increasing  
514 levels of melanization. Using Adobe Photoshop (version 6.0), the r-value was obtained for each  
515 bead within a caterpillar and these values averaged to provide an r-value score for each  
516 individual caterpillar. The mean r-value was transformed into a percentage of melanization ( $1 -$   
517  $(r\text{-value}/\text{maximum } r\text{-value})$ ) for ease of interpretation, so that high values indicate a greater  
518 degree of melanization and vice versa (Smilanich et al., 2009a; Smilanich et al., 2009b).

### 519 *Statistical Analysis*

520 Parasitism/Injection Experiment: We used ANCOVA to assess differences in amounts of food  
521 eaten following immune challenge. This was done for total food eaten, and for high protein and  
522 low protein foods separately. Models included treatment, family (treated as a random effect),  
523 initial mass, and significant two-way interactions. We used Tukey tests to identify differences in  
524 amounts of foods eaten by caterpillars in different treatments. To assess changes in preference  
525 associated with immune challenge, we used paired t-tests.

526 To identify differences in nutrient regulation in the two days following immune  
527 challenge, we analyzed the ratio of protein to carbohydrate consumed, and the bivariate response,  
528 amounts of protein and carbohydrate consumed. The ratios of protein to carbohydrate consumed  
529 were log transformed and analyzed using ANCOVA with the same factors in the models as we  
530 used for the consumption data. We analyzed amounts of protein and carbohydrate consumed  
531 using MANCOVAs (main effect: treatment; covariate: initial mass) to identify treatment  
532 differences in self-regulated macronutrient intake, and performed planned comparisons to  
533 discern which treatment(s) differed from the control. We also performed univariate planned  
534 comparisons to identify whether intake of protein, carbohydrate, or both were responsible for  
535 significant differences between treatments.

536 Choice Experiment: We used the same analytical procedures in the Choice Experiment as in the  
537 Parasitism/Injection experiment, with a few modifications. Because, in this case, we measured  
538 consumption before and after immune challenge, we used repeated measures ANCOVAs to  
539 analyze both consumption data, and protein to carbohydrate ratios. Repeated measures  
540 ANCOVA models included the independent variables immune challenge (bead-injected, sham-

541 injected, control), time (before injection, after injection), and the time\*treatment interaction. We  
542 did not include family as a covariate in these models, or in those for the No-Choice experiment  
543 because there were too few individuals of the same family used in the experiments for  
544 meaningful interpretation of family effects. We did not use t-tests to evaluate changes in food  
545 preference associated with immune challenge because the set of caterpillars used in this  
546 experiment exhibited clear preferences for low protein foods regardless of dietary treatment.  
547 Differences in the strength of this preference are reflected in results of Tukey tests applied to  
548 consumption data.

549 No-Choice Experiment: We analyzed the amounts of food ingested by caterpillars before and  
550 after injection using repeated measures ANCOVA, with the same variables indicated for the  
551 Choice Experiment, with the addition of the variable diet (low protein, optimal protein). Tukey  
552 tests were used to identify treatment differences in amounts of foods eaten. Because caterpillars  
553 ate only one diet in this experiment, protein and carbohydrate intake were perfectly correlated  
554 with the amount of food consumed, precluding separate analyses of how each macronutrient  
555 affected melanization.

556 Injection Assay: To assess the effect of the amounts of foods eaten on melanization when  
557 caterpillar body size was accounted for, we regressed amount of food eaten over caterpillar mass,  
558 and used residuals in Spearman's rank correlations with melanization data.

559 All statistics were calculated using JMP statistical software (JMP, 2007). Full models and their  
560 results can be found in Tables S1-S6 of the supplementary materials.

## 561 **Acknowledgements**

562 We thank Nickolas Fesenko, Aaron Greenberg, Yumin He, Isaac Lichter-Marck and Collin  
563 McMichael of the Singer Laboratory at Wesleyan University for their help maintaining the  
564 breeding colony of *G. incorrupta* from which individuals were taken for these experiments, and  
565 Lucy Sprung for assistance in bead retrieval. We also thank an anonymous reviewer and Spence  
566 Behmer for valuable comments on the manuscript.

567

## 568 **Author Contributions**

569 M.S.S. is responsible for conception of the project. All authors were involved in experimental  
570 design, P.A.M. and A.M.S. executed the experiments, and all authors were involved in the  
571 interpretation of results. P.A.M. wrote the manuscript, and M.S.S. and A.M.S. edited it.

## 572 **Competing Interests**

573 No competing interests declared.

574

## 575 **Funding**

576 This work was supported by The National Science Foundation, DDIG #1011503, and NSF  
577 #0744676 to M.S.S.

578

## 579 **Figure Legend**

580 Figure 1. Amount of high protein and low protein foods consumed by caterpillars for the first  
581 (above) and the second (below) 24-hour period following the time of immune challenge in the  
582 Parasitism/Injection Experiment. Least square means were derived from the repeated measures  
583 ANCOVA, detailed in Table S1. Letters above bars correspond to Tukey tests performed on total  
584 amounts of foods (*italics*), amounts of high protein foods (**capital**) and amounts of low protein  
585 foods (**lower case**) eaten. Letters are absent above individual bars in the top panel because  
586 amounts of individual foods did not differ significantly across treatments. Columns or pairs of  
587 columns not sharing a letter of the same case or style are statistically distinct. Error bars show  
588 standard errors and numbers at the base of columns indicate sample sizes.

589 Figure 2. Bivariate least square means ( $\pm 1$  SE) of protein and carbohydrate intake for  
590 caterpillars in the Parasitism/Injection Experiment in the first day (above) and the second day  
591 (below) following immune challenge. Least square means account for variation in family, its  
592 interaction with treatment, and the initial masses of caterpillars. Symbols where trajectories  
593 terminate represent the intake points (non-cumulative) reached each day following immune  
594 challenge. The broken line indicates the trajectory if caterpillars had eaten equal amounts of  
595 protein and carbohydrate. For statistical comparison of intake points, see Table S3.

596 Figure 3. Amount of high protein and low protein food consumed by caterpillars in control,  
597 sham-injected, and injected treatments in the 24 hours before (above) and after (below) the time

598 of immune challenge in the Choice Experiment. Least square means were derived from the  
599 repeated measures ANCOVA, detailed in Table S4. Letters above bars correspond to Tukey tests  
600 performed on total amounts of foods (*italics*), amounts of high protein foods (*capital*) and  
601 amounts of low protein foods (*lower case*) eaten. Letters are absent above individual bars in the  
602 top panel because amounts of individual foods did not differ significantly across treatments.  
603 Columns or pairs of columns not sharing a letter of the same case or style are statistically  
604 distinct. Error bars show standard errors and numbers at the base of columns indicate sample  
605 sizes.

606 Figure 4. Bivariate least square means ( $\pm 1$  SE) of protein and carbohydrate intake for  
607 caterpillars in the Choice Experiment for the day before (above) and the day following (below)  
608 immune challenge. Least square means account for variation in family, its interaction with  
609 treatment, and the initial masses of caterpillars. Symbols where trajectories terminate represent  
610 the intake points (non-cumulative) reached for the 24-hour period before and after immune  
611 challenge. The broken line indicates the trajectory if caterpillars had eaten equal amounts of  
612 protein and carbohydrate. For statistical comparison of intake points, see Table S3.

613 Figure 5. Correlations between food consumption (corrected for caterpillar size) and  
614 melanization of beads in *G. incorrupta* before and after immune challenge when fed three  
615 experimental diets (LP = low protein, OP = optimal protein, and Choice = self regulated between  
616 high and low protein foods). Trendlines are only drawn, and statistics provided when the  
617 Spearman's rank correlation was significant. Scale was omitted from some panels for clarity, but  
618 in each case, the x-axis ranges from -200 to 200, and the y-axis ranges from 0-80%.

619 Figure 6. Amount of food consumed by caterpillars in control, sham-injected, and injected  
620 treatments in the 24 hours before (above) and following (below) immune challenge in the No-  
621 Choice Experiment. Least square means were derived from the repeated measures ANCOVA,  
622 detailed in Table S6. Capital and lower-case letters correspond to Tukey tests performed on data  
623 from high protein and low protein fed groups separately. Columns not sharing a letter of the  
624 same case are statistically distinct. Error bars show standard errors and sample sizes appear at the  
625 base of each column.

626

627 **References**

- 628 **Adamo, S. A.** (2004). How should behavioural ecologists interpret measurements of  
629 immunity? *Animal Behaviour* **68**, 1443-1449.
- 630 **Adamo, S. A.** (2006). Comparative psychoneuroimmunology: Evidence from the insects.  
631 *Behavioral and Cognitive Neuroscience Reviews* **5**, 128-140.
- 632 **Adamo, S. A., Bartlett, A., Le, J., Spencer, N. and Sullivan, K.** (2010). Illness-induced  
633 anorexia may reduce trade-offs between digestion and immune function. *Animal Behaviour* **79**,  
634 3-10.
- 635 **Anderson, R. D., Blanford, S. and Thomas, M. B.** (2013). House flies delay fungal  
636 infection by fevering: at a cost. *Ecological Entomology* **38**, 1-10.
- 637 **Ayres, J. S. and Schneider, D. S.** (2009). The role of anorexia in resistance and  
638 tolerance to infections in *Drosophila*. *Plos Biology* **7**.
- 639 **Beckage, N. E.** (2008). *Insect Immunology*: Academic Press: Elsevier, Inc.
- 640 **Behmer, S. T.** (2009). Insect herbivore nutrient regulation. In *Annual Review of*  
641 *Entomology*, vol. 54, pp. 165-187.
- 642 **Behmer, S. T. and Joern, A.** (2008). Coexisting generalist herbivores occupy unique  
643 nutritional feeding niches. *Proceedings of the National Academy of Sciences of the United States*  
644 *of America* **105**, 1977-1982.
- 645 **Behmer, S. T., Simpson, S. J. and Raubenheimer, D.** (2002). Herbivore foraging in  
646 chemically heterogeneous environments: Nutrients and secondary metabolites. *Ecology* **83**,  
647 2489-2501.
- 648 **Bernays, E. A. and Chapman, R. F.** (1994). *Host-plant Selection by Phytophagous*  
649 *Insects*. New York: Chapman & Hall.
- 650 **Bernays, E. A. and Singer, M. S.** (2005). Taste alteration and endoparasites. *Nature*  
651 **436**, 476-476.
- 652 **Best, A., Tidbury, H., White, A. and Boots, M.** (2013). The evolutionary dynamics of  
653 within-generation immune priming in invertebrate hosts. *Journal of the Royal Society Interface*  
654 **10**.
- 655 **Cotter, S. C., Kruuk, L. E. B. and Wilson, K.** (2004). Costs of resistance: genetic  
656 correlations and potential trade-offs in an insect immune system. *Journal of Evolutionary*  
657 *Biology* **17**, 421-429.
- 658 **Cotter, S. C., Myatt, J. P., Benskin, C. M. H. and Wilson, K.** (2008). Selection for  
659 cuticular melanism reveals immune function and life-history trade-offs in *Spodoptera littoralis*.  
660 *Journal of Evolutionary Biology* **21**, 1744-1754.
- 661 **Cotter, S. C., Simpson, S. J., Raubenheimer, D. and Wilson, K.** (2011). Macronutrient  
662 balance mediates trade-offs between immune function and life history traits. *Functional Ecology*  
663 **25**, 186-198.
- 664 **Elliot, S. L., Blanford, S. and Thomas, M. B.** (2002). Host-pathogen interactions in a  
665 varying environment: temperature, behavioural fever and fitness. *Proceedings of the Royal*  
666 *Society B-Biological Sciences* **269**, 1599-1607.
- 667 **Fedorka, K. M., Zuk, M. and Mousseau, T. A.** (2004). Immune suppression and the  
668 cost of reproduction in the ground cricket, *Allonemobius socius*. *Evolution* **58**, 2478-2485.
- 669 **Hughes, D. P., Brodeur, J. and Thomas, F.** (2012). *Host Manipulation by Parasites*:  
670 Oxford University Press.

- 671           **Inglis, G. D., Johnson, D. L. and Goettel, M. S.** (1996). Effects of temperature and  
672 thermoregulation on mycosis by *Beauveria bassiana* in grasshoppers. *Biological Control* **7**, 131-  
673 139.
- 674           **JMP.** (2007). Version 7. Cary, NC 1989-2007: SAS Institute Inc.
- 675           **Kanost, M. R. and Gorman, M. J.** (2008). Phenyloxidases in Insect Immunity. In *Insect*  
676 *Immunology*, (ed. N. E. Beckage), pp. 69-96: Academic Press: Elsevier, Inc.
- 677           **Karban, R. and Baldwin, I. T.** (1997). *Induced Responses to Herbivory*. Chicago: The  
678 University of Chicago Press.
- 679           **Kurtz, J. and Franz, K.** (2003). Evidence for memory in invertebrate immunity. *Nature*  
680 **425**, 37-38.
- 681           **Kyriazakis, I., Anderson, D. H., Oldham, J. D., Coop, R. L. and Jackson, F.** (1996).  
682 Long-term subclinical infection with *Trichostrongylus colubriformis*: Effects on food intake, diet  
683 selection and performance of growing lambs. *Veterinary Parasitology* **61**, 297-313.
- 684           **Kyriazakis, I., Oldham, J. D., Coop, R. L. and Jackson, F.** (1994). The effect of  
685 subclinical intestinal nematode infection on the diet of growing sheep. *British Journal of*  
686 *Nutrition* **72**, 665-677.
- 687           **Kyriazakis, I., Tolkamp, B. J. and Hutchings, M. R.** (1998). Towards a functional  
688 explanation for the occurrence of anorexia during parasitic infections. *Animal Behaviour* **56**,  
689 265-274.
- 690           **Lavine, M. D. and Beckage, N. E.** (1996). Temporal pattern of parasitism-induced  
691 immunosuppression in *Manduca sexta* larvae parasitized by *Cotesia congregata*. *Journal of*  
692 *Insect Physiology* **42**, 41-51.
- 693           **Lavine, M. D. and Strand, M. R.** (2002). Insect hemocytes and their role in immunity.  
694 *Insect Biochemistry and Molecular Biology* **32**, 1295-1309.
- 695           **Lee, K. P., Behmer, S. T. and Simpson, S. J.** (2006a). Nutrient regulation in relation to  
696 diet breadth: a comparison of *Heliothis* sister species and a hybrid. *Journal of Experimental*  
697 *Biology* **209**, 2076-2084.
- 698           **Lee, K. P., Cory, J. S., Wilson, K., Raubenheimer, D. and Simpson, S. J.** (2006b).  
699 Flexible diet choice offsets protein costs of pathogen resistance in a caterpillar. *Proceedings of*  
700 *the Royal Society B-Biological Sciences* **273**, 823-829.
- 701           **Lee, K. P., Raubenheimer, D., Behmer, S. T. and Simpson, S. J.** (2003). A correlation  
702 between macronutrient balancing and insect host-plant range: evidence from the specialist  
703 caterpillar *Spodoptera exempta* (Walker). *Journal of Insect Physiology* **49**, 1161-1171.
- 704           **Lee, K. P., Simpson, S. J. and Wilson, K.** (2008). Dietary protein-quality influences  
705 melanization and immune function in an insect. *Functional Ecology* **22**, 1052-1061.
- 706           **Lefevre, T., Oliver, L., Hunter, M. D. and de Roode, J. C.** (2010). Evidence for trans-  
707 generational medication in nature. *Ecology Letters* **13**, 1485-1493.
- 708           **Mattson, W. J.** (1980). Herbivory in relation to plant nitrogen content. *Annual Review of*  
709 *Ecology and Systematics* **11**, 119-161.
- 710           **Medzhitov, R. and Janeway, C. A.** (1998). An ancient system of host defense. *Current*  
711 *Opinion in Immunology* **10**, 12-15.
- 712           **Moore, J.** (2002). *Parasites and the Behavior of Animals*: Oxford University Press.
- 713           **Moret, Y. and Schmid-Hempel, P.** (2001). Immune defence in bumble-bee offspring.  
714 *Nature* **414**, 506-506.

- 715 **Moret, Y. and Siva-Jothy, M. T.** (2003). Adaptive innate immunity? Responsive-mode  
 716 prophylaxis in the mealworm beetle, *Tenebrio molitor*. *Proceedings of the Royal Society B-*  
 717 *Biological Sciences* **270**, 2475-2480.
- 718 **Ponton, F., Lalubin, F., Fromont, C., Wilson, K., Behm, C. and Simpson, S. J.**  
 719 (2011). Hosts use altered macronutrient intake to circumvent parasite-induced reduction in  
 720 fecundity. *International Journal for Parasitology* **41**, 43-50.
- 721 **Ponton, F., Wilson, K., Holmes, A. J., Cotter, S. C., Raubenheimer, D. and Simpson,**  
 722 **S. J.** (2013). Integrating nutrition and immunology: A new frontier. *Journal of Insect Physiology*  
 723 **59**, 130-137.
- 724 **Povey, S., Cotter, S. C., Simpson, S. J., Lee, K. P. and Wilson, K.** (2009). Can the  
 725 protein costs of bacterial resistance be offset by altered feeding behaviour? *Journal of Animal*  
 726 *Ecology* **78**, 437-446.
- 727 **Raubenheimer, D. and Simpson, S. J.** (1993). The geometry of compensatory feeding  
 728 in the locust. *Animal Behaviour* **45**, 953-964.
- 729 **Raubenheimer, D. and Simpson, S. J.** (1999). Integrating nutrition: a geometrical  
 730 approach. *Entomologia Experimentalis Et Applicata* **91**, 67-82.
- 731 **Raubenheimer, D. and Simpson, S. J.** (2003). Nutrient balancing in grasshoppers:  
 732 behavioural and physiological correlates of dietary breadth. *Journal of Experimental Biology*  
 733 **206**, 1669-1681.
- 734 **Raubenheimer, D. and Simpson, S. J.** (2004). Organismal stoichiometry: Quantifying  
 735 non-independence among food components. *Ecology* **85**, 1203-1216.
- 736 **Rolff, J. and Siva-Jothy, M. T.** (2003). Invertebrate ecological immunology. *Science*  
 737 **301**, 472-475.
- 738 **Schmid-Hempel, P.** (2003). Variation in immune defence as a question of evolutionary  
 739 ecology. *Proceedings of the Royal Society B-Biological Sciences* **270**, 357-366.
- 740 **Schmid-Hempel, P.** (2005). Evolutionary ecology of insect immune defenses. *Annual*  
 741 *Review of Entomology* **50**, 529-551.
- 742 **Schmidt, B. C. and Sperling, F. A. H.** (2008). Widespread decoupling of mtDNA  
 743 variation and species integrity in *Grammia* tiger moths (Lepidoptera: Noctuidae). *Systematic*  
 744 *Entomology* **33**, 613-634.
- 745 **Schulenburg, H., Kurtz, J., Moret, Y. and Siva-Jothy, M. T.** (2009). Ecological  
 746 immunology. *Philosophical Transactions of the Royal Society B-Biological Sciences* **364**, 3-14.
- 747 **Schwartz, A. and Koella, J. C.** (2002). Melanization of *Plasmodium falciparum* and c-  
 748 25 sephadex beads by field-caught *Anopheles gambiae* (Diptera : Culicidae) from southern  
 749 Tanzania. *Journal of Medical Entomology* **39**, 84-88.
- 750 **Scriber, J. M. and Slansky, F.** (1981). The nutritional ecology of immature insects.  
 751 *Annual Review of Entomology* **26**, 183-211.
- 752 **Simone-Finstrom, M. D. and Spivak, M.** (2012). Increased resin collection after  
 753 parasite challenge: A case of self-medication in honey bees? *Plos One* **7**.
- 754 **Simpson, S. J. and Raubenheimer, D.** (1993). A multilevel analysis of feeding-  
 755 behavior: The geometry of nutritional decisions. *Philosophical Transactions of the Royal Society*  
 756 *of London Series B-Biological Sciences* **342**, 381-402.
- 757 **Simpson, S. J., Sibly, R. M., Lee, K. P., Behmer, S. T. and Raubenheimer, D.** (2004).  
 758 Optimal foraging when regulating intake of multiple nutrients. *Animal Behaviour* **68**, 1299-1311.



- 759 **Singer, M. S., Bernays, E. A. and Carriere, Y.** (2002). The interplay between nutrient  
760 balancing and toxin dilution in foraging by a generalist insect herbivore. *Animal Behaviour* **64**,  
761 629-643.
- 762 **Singer, M. S., Carriere, Y., Theuring, C. and Hartmann, T.** (2004). Disentangling  
763 food quality from resistance against parasitoids: Diet choice by a generalist caterpillar. *American*  
764 *Naturalist* **164**, 423-429.
- 765 **Singer, M. S., Mace, K. C. and Bernays, E. A.** (2009). Self-medication as adaptive  
766 plasticity: Increased ingestion of plant toxins by parasitized caterpillars. *Plos One* **4**.
- 767 **Singer, M. S. and Stireman, J. O.** (2001). How foraging tactics determine host-plant use  
768 by a polyphagous caterpillar. *Oecologia* **129**, 98-105.
- 769 **Singer, M. S. and Stireman, J. O.** (2003). Does anti-parasitoid defense explain host-  
770 plant selection by a polyphagous caterpillar? *Oikos* **100**, 554-562.
- 771 **Siva-Jothy, M. T. and Thompson, J. J. W.** (2002). Short-term nutrient deprivation  
772 affects immune function. *Physiological Entomology* **27**, 206-212.
- 773 **Slansky, F. and Wheeler, G. S.** (1992). Caterpillars compensatory feeding response to  
774 diluted nutrients leads to toxic allelochemical dose. *Entomologia Experimentalis Et Applicata*  
775 **65**, 171-186.
- 776 **Smilanich, A. M., Dyer, L. A., Chambers, J. Q. and Bowers, M. D.** (2009a).  
777 Immunological cost of chemical defence and the evolution of herbivore diet breadth. *Ecology*  
778 *Letters* **12**, 612-621.
- 779 **Smilanich, A. M., Dyer, L. A. and Gentry, G. L.** (2009b). The insect immune response  
780 and other putative defenses as effective predictors of parasitism. *Ecology* **90**, 1434-1440.
- 781 **Smilanich, A. M., Mason, P. A., Sprung, L., Chase, T. R. and Singer, M. S.** (2011a).  
782 Complex effects of parasitoids on pharmacophagy and diet choice of a polyphagous caterpillar.  
783 *Oecologia* **165**, 995-1005.
- 784 **Smilanich, A. M., Vargas, J., Dyer, L. A. and Bowers, M. D.** (2011b). Effects of  
785 ingested secondary metabolites on the immune response of a polyphagous caterpillar *Grammia*  
786 *incorrupta*. *Journal of Chemical Ecology* **37**, 239-245.
- 787 **Srygley, R. B., Lorch, P. D., Simpson, S. J. and Sword, G. A.** (2009). Immediate  
788 protein dietary effects on movement and the generalised immunocompetence of migrating  
789 Mormon crickets *Anabrus simplex* (Orthoptera: Tettigoniidae). *Ecological Entomology* **34**, 663-  
790 668.
- 791 **Stireman, J. O. and Singer, M. S.** (2002). Spatial and temporal variation in the  
792 parasitoid assemblage of an exophytic polyphagous caterpillar. *Ecological Entomology* **27**, 588-  
793 600.
- 794 **Strand, M. R.** (2008). Insect hemocytes and their role in immunity. In *Insect*  
795 *Immunology*, (ed. N. E. Beckage), pp. 25-48: Elsevier, Inc.
- 796 **Thompson, S. N. and Redak, R. A.** (2005). Feeding behaviour and nutrient selection in  
797 an insect *Manduca sexta* L. and alterations induced by parasitism. *Journal of Comparative*  
798 *Physiology a-Neuroethology Sensory Neural and Behavioral Physiology* **191**, 909-923.
- 799 **Thompson, S. N., Redak, R. A. and Wang, L. W.** (2005). Host nutrition determines  
800 blood nutrient composition and mediates parasite developmental success: *Manduca sexta* L.  
801 parasitized by *Cotesia congregata* (Say). *Journal of Experimental Biology* **208**, 625-635.
- 802 **Tidbury, H. J., Pedersen, A. B. and Boots, M.** (2011). Within and transgenerational  
803 immune priming in an insect to a DNA virus. *Proceedings of the Royal Society B-Biological*  
804 *Sciences* **278**, 871-876.

805 **Yamamoto, R. T.** (1969). Mass rearing of tobacco hornworm. 2. Larval rearing and  
806 pupation. *Journal of Economic Entomology* **62**, 1427.

807 **Zuk, M. and Stoehr, A. M.** (2002). Immune defense and host life history. *American*  
808 *Naturalist* **160**, S9-S22.

809

810

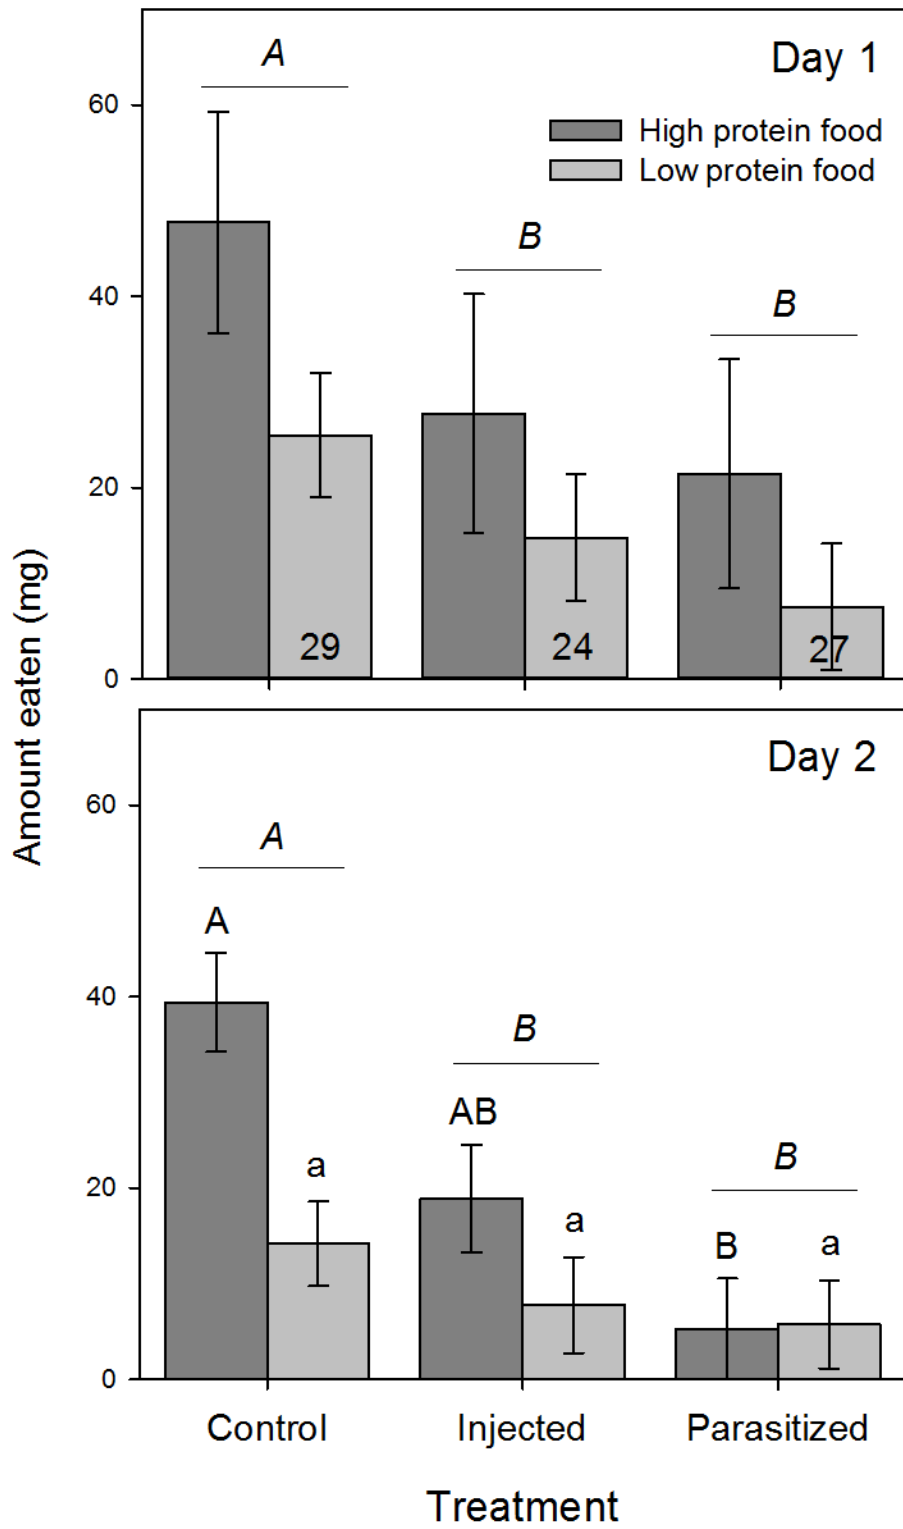

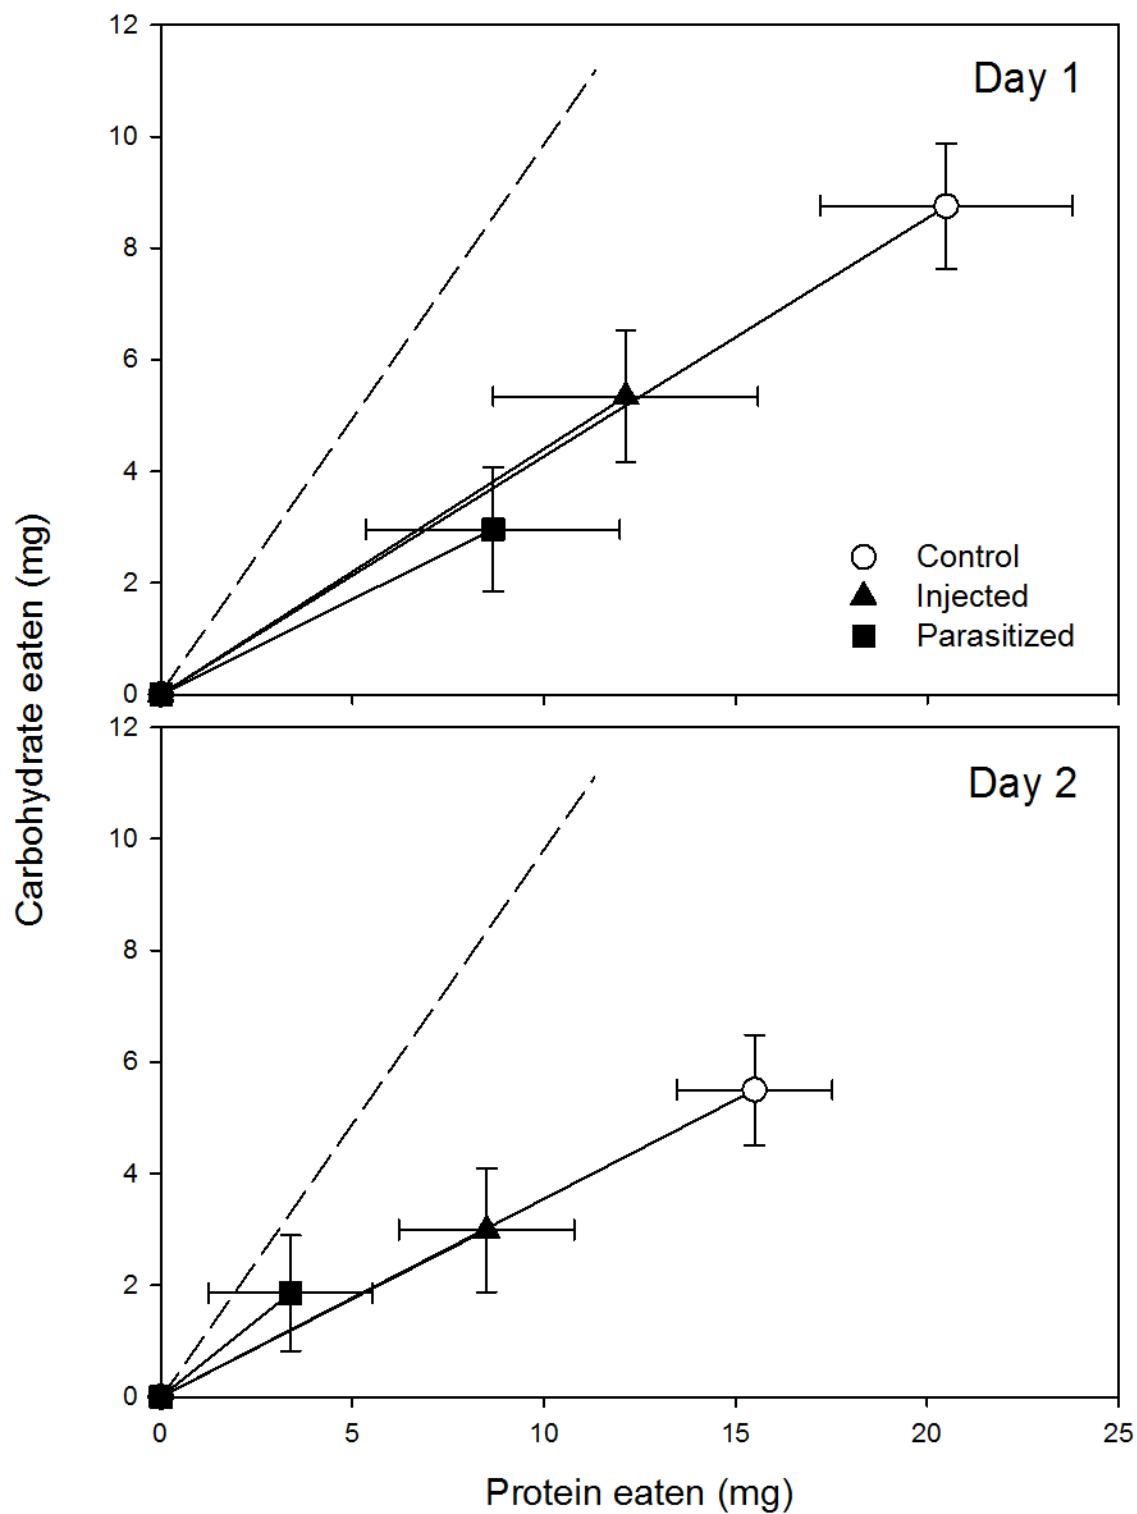

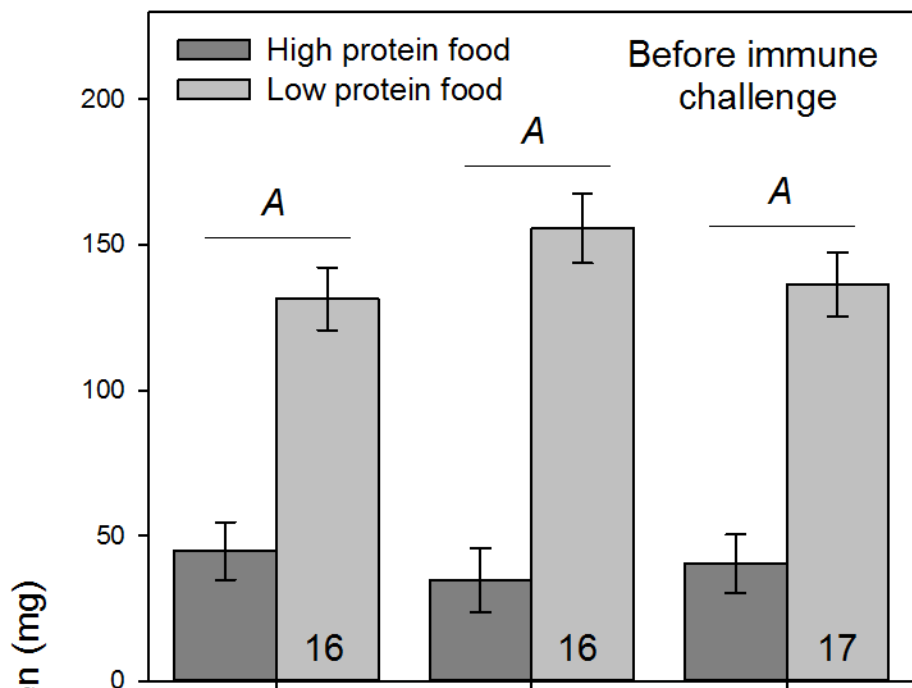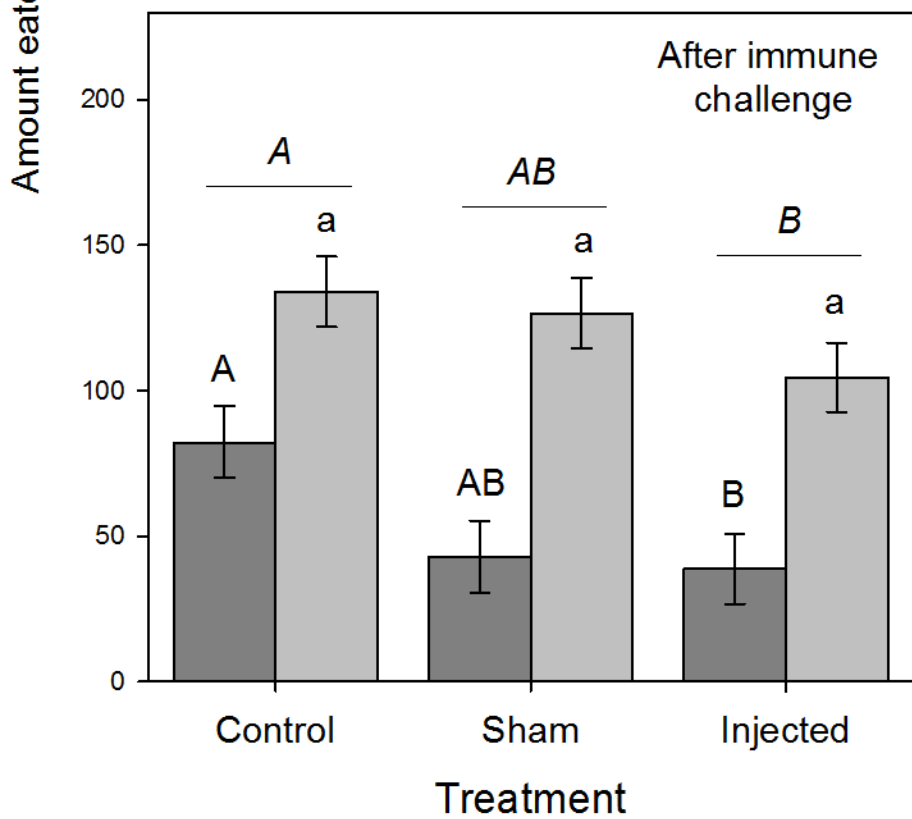

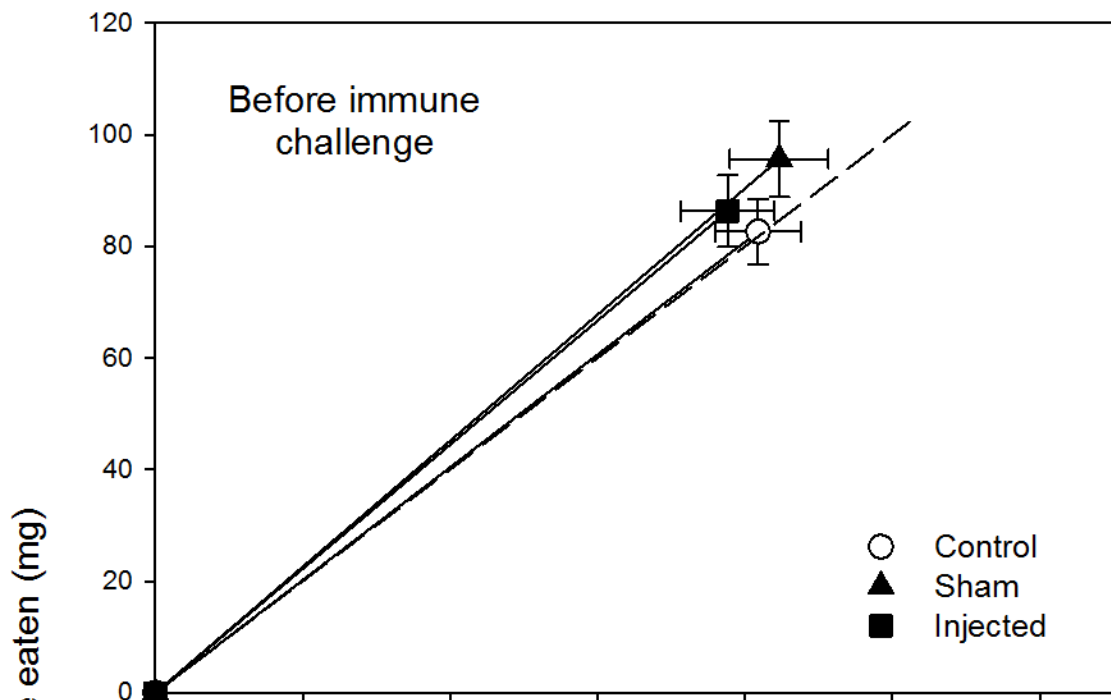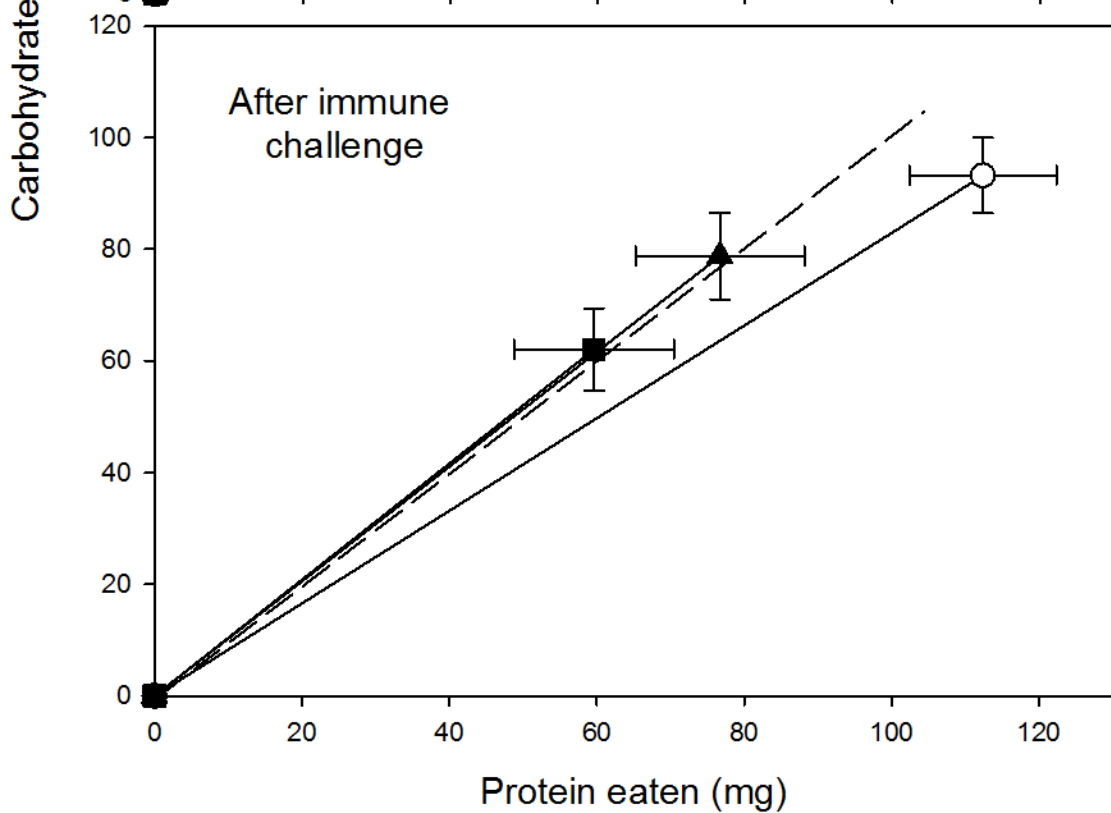

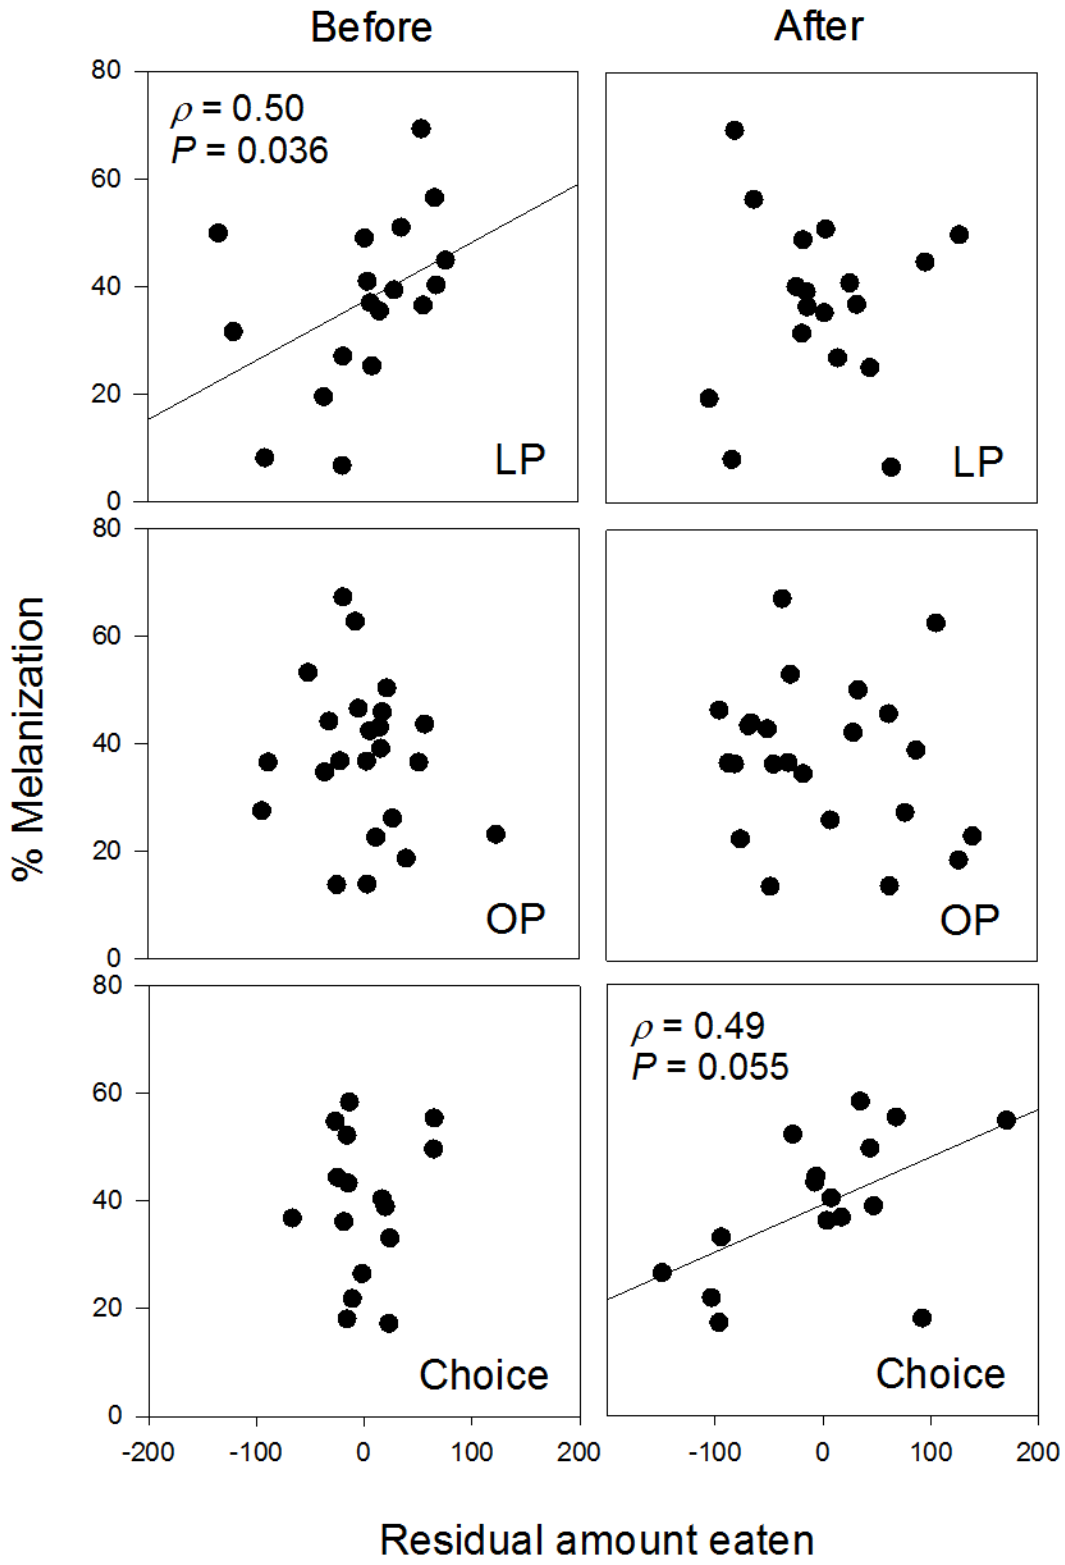

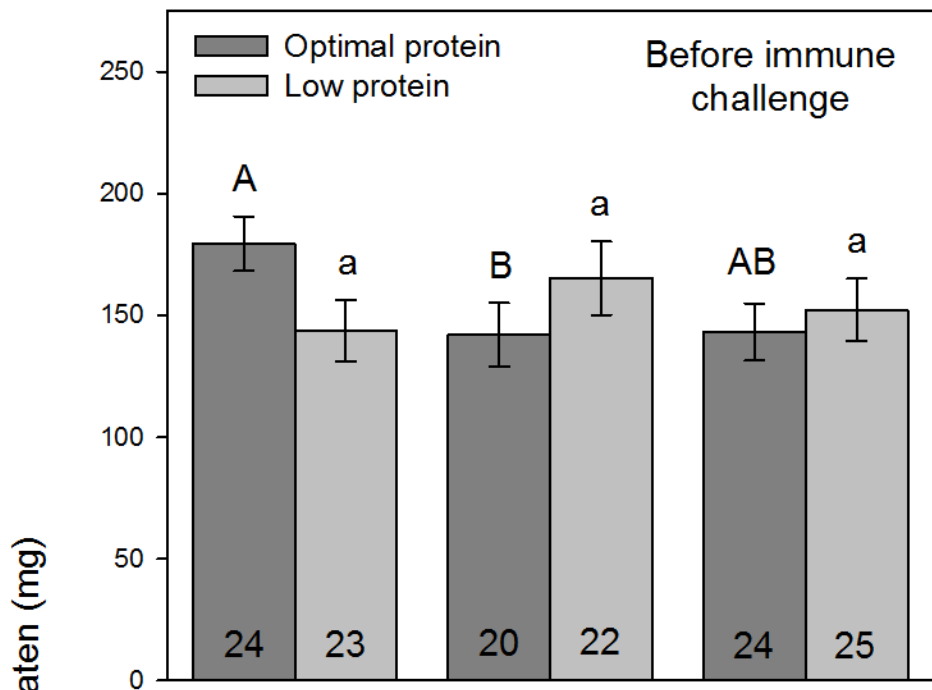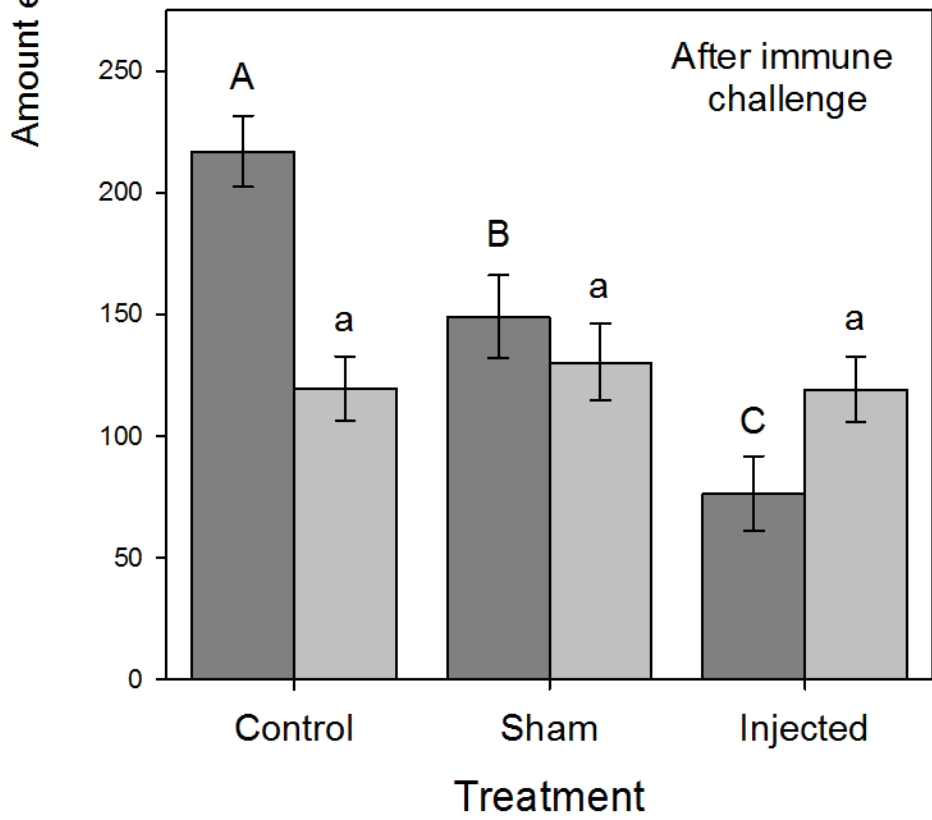

Source: https://cob.silverchair.com/jeb/article-pdf/doi/10.1242/jeb.093716/2037493/jeb_093716.pdf
